1 ***In silico* secretome characterization of clinical *Mycobacterium***  
2 ***abscessus* isolates provides insights into antigenic differences**

3  
4 **Fernanda Cornejo-Granados<sup>1</sup>, Thomas A. Kohl<sup>2,3</sup>, Flor Vásquez Sotomayor<sup>4</sup>, Sönke**  
5 **Andres<sup>4</sup>, Rogelio Hernández-Pando<sup>5</sup>, Juan Manuel Hurtado-Ramírez<sup>1</sup>, Christian**  
6 **Utpatel<sup>2,3</sup>, Stefan Niemann<sup>2,3</sup>, Florian P. Maurer<sup>4,6,#\*</sup> and Adrian Ochoa-Leyva<sup>1,#\*</sup>**

7  
8 <sup>1</sup> Departamento de Microbiología Molecular, Instituto de Biotecnología, Universidad  
9 Nacional Autónoma de México, Cuernavaca, Morelos, México.

10 <sup>2</sup> Molecular and Experimental Mycobacteriology, Research Center Borstel, Borstel,  
11 Germany

12 <sup>3</sup> German Center for Infection Research (DZIF), Partner site Hamburg-Lübeck-Borstel,  
13 Borstel, Germany

14 <sup>4</sup> National and WHO Supranational Reference Center for Mycobacteria, Research Center  
15 Borstel, Leibniz Lung Center, Borstel, Germany

16 <sup>5</sup> Experimental Pathology Section, National Institute of Medical Sciences and Nutrition  
17 Salvador Zubirán, Mexico City, Mexico.

18 <sup>6</sup> Institute of Medical Microbiology, Virology and Hospital Hygiene, University Medical  
19 Center Hamburg-Eppendorf, Hamburg, Germany

20  
21 #equal contribution

22  
23 **Correspondance:**

24 \* co-corresponding authors:

25 Adrian Ochoa-Leyva: [aocchoa@ibt.unam.mx](mailto:aocchoa@ibt.unam.mx)

26 Florian P. Maurer: [fmaurer@fz-borstel.de](mailto:fmaurer@fz-borstel.de)

27  
28 **Keywords: bioinformatics, antigenicity, *M. abscessus* subspecies, in silico analysis,**  
29 **vaccinology.**

30 **Abstract**

31

32 *Mycobacterium abscessus* (MAB) is a widely disseminated pathogenic non-tuberculous  
33 mycobacterium (NTM). Like with *M. tuberculosis* complex (MTBC), excreted / secreted  
34 (ES) proteins play an essential role for its virulence and survival inside the host. ES  
35 proteins contain highly immunogenic proteins, which are of interest for novel diagnostic  
36 assays and vaccines. Here, we used a robust bioinformatics pipeline to predict the  
37 secretome of the *M. abscessus* ATCC 19977 reference strain and fifteen clinical isolates  
38 belonging to all three MAB subspecies, *M. abscessus* subsp. *abscessus*, *M. abscessus* subsp.  
39 *bolletii*, and *M. abscessus* subsp. *massiliense*. We found that ~18% of the proteins encoded  
40 in the MAB genomes were predicted as secreted and that the three MAB subspecies shared >  
41 85 % of the predicted secretomes. MAB isolates with a rough (R) colony morphotype  
42 showed larger predicted secretomes than isolates with a smooth (S) morphotype.  
43 Additionally, proteins exclusive to the secretomes of MAB R variants had higher antigenic  
44 densities than those exclusive to S variants, independently of the subspecies. For all  
45 investigated isolates, ES proteins had a significantly higher antigenic density than non-ES  
46 proteins. We identified 337 MAB ES proteins with homologues in previously investigated  
47 *M. tuberculosis* secretomes. Among these, 222 have previous experimental support of  
48 secretion, and some proteins showed homology with protein drug targets reported in the  
49 DrugBank database. The predicted MAB secretomes showed a higher abundance of  
50 proteins related to quorum-sensing and Mce domains as compared to MTBC indicating the  
51 importance of these pathways for MAB pathogenicity and virulence. Comparison of the  
52 predicted secretome of *M. abscessus* ATCC 19977 with the list of essential genes revealed  
53 that 99 secreted proteins corresponded to essential proteins required for *in vitro* growth. All  
54 predicted secretomes were deposited in the Secret-AAR web-server  
55 (<http://microbiomics.ibt.unam.mx/tools/aar/index.php>).

56

57

58

59

60

61

62

63

64

65

66

67

68

69

70

71

72

73

74

75

76

## 77 Introduction

78

79

80

81

82

83

84

85

86

87

88

89

90

91

92

93

94

95

96

97

98

99

100

101

102

103

104

105

106

107

108

109

110

111

112

113

114

115

116

117

118

119

120

121

122

123

Non-tuberculous mycobacteria (NTM) are widely disseminated, mostly saprophytic and partly opportunistic bacteria. The prevalence of NTM in clinical specimens has increased globally, and in some industrialized countries, infections caused by NTM are becoming more common than tuberculosis (TB). Infections caused by *M. abscessus* (MAB) are particularly challenging to manage due to the extensive innate resistance of MAB against a wide spectrum of clinically available antimicrobials (Nessar et al., 2012). MAB causes mostly pulmonary and occasionally extrapulmonary infections that can affect all organs in the human body (Lee et al., 2015). Current treatments for MAB induced pulmonary disease are long, associated with severe side effects and a cure rate below 50 % (Chen et al., 2019; Jarand et al., 2011; Sanguinetti et al., 2001). MAB is comprised of three subspecies, *M. abscessus* subsp. *abscessus*, *M. abscessus* subsp. *bolletii* and *M. abscessus* subsp. *massiliense*, hereafter referred to as MAB<sub>A</sub>, MAB<sub>B</sub>, and MAB<sub>M</sub>, respectively (Tortoli et al., 2016). MAB isolates can show smooth (S) and rough (R) colony morphotypes, a trait that relies on the presence (S) or absence (R) of surface-associated glycopeptidolipids (GPLs) and that correlates with the virulence of the strain (Abeles and Pride, 2014; Howard et al., 2006; Ripoll et al., 2007) (Gutiérrez et al., 2018)). Transitioning from high-GPL to low-GPL production is observed in sequential MAB isolates obtained from patients with chronic underlying pulmonary disease. In these patients, S-to-R conversion is thought to present a selective advantage as the aggregative properties of MAB R variants strongly affect intracellular survival. In addition, a propensity to grow as extracellular cords allows these low-GPL producing bacilli to escape innate immune defenses (Gutiérrez et al., 2018).

The complete set of proteins excreted / secreted (ES) by a bacterial cell is referred to as its secretome. The secretome is involved in critical biological processes such as cell adhesion, migration, cell-to-cell communication and signal transduction (Tjalsma et al., 2004) ES proteins are considered an important source of molecules for serological diagnosis. Also, secreted proteins can be highly antigenic due to their immediate availability to the host immune system and are thus of interest in vaccinology (Daugelat et al., 1992; Zheng et al., 2013). So far, there have been few efforts to experimentally determine the secretome of MAB, and in particular, the secretomes of clinical MAB isolates (Gupta et al., 2009; Laencina et al., 2018; Shin et al., 2010; Yadav and Gupta, 2012). Nowadays, sequencing and bioinformatics strategies can be explored for the systematized prediction of ES proteins from bacterial genomes (Cornejo-Granados et al., 2017; Gomez et al., 2015). Recently, a robust bioinformatics pipeline for predicting and analyzing the complete *in silico* secretome of two clinical *M. tuberculosis* (MTB) genomes was published in 2017 by our group showing higher overall agreement with an experimental secretome compiled from literature than two previously reported secretomes for *M. tuberculosis* H37Rv (Cornejo-Granados et al., 2017).

To gain further insights into MAB ES proteins and their association with virulence and pathogenicity we sequenced and assembled the genomes of fifteen clinical MAB isolates belonging to all three subspecies including S and R morphotypes. We then adapted the bioinformatics strategy previously established for MTB to predict and analyze the complete set of ES proteins encoded in these isolates and in the *M. abscessus* ATCC 19977 type strain, and compared it with our previous findings for MTB (Cornejo-Granados et al., 2017).

124

125

## 126 **Materials and methods**

127

### 128 *Ethics statement*

129

130 Ethical review and approval was not required for the study as all work was performed on  
131 bacterial isolates archived at the strain repository of the National Reference Center for  
132 Mycobacteria in Borstel, Germany, in accordance with local legislation and institutional  
133 requirements. In particular, no data allowing identification of the affected patients was  
134 shared or released and no human DNA was sequenced or analyzed.

135

### 136 *Clinical isolates*

137

138 We selected fifteen MAB clinical isolates comprising members of all MAB  
139 subspecies (MAB<sub>A</sub>, n = 7; MAB<sub>B</sub>, n = 4; MAB<sub>M</sub>, n = 4) and both S (n = 8) and R (n = 6)  
140 morphotypes (not determined, n = 1). The strains were isolated from different biological  
141 sources representing both pulmonary colonization / infection (sputum, n = 10) and  
142 extrapulmonary samples (skin, n = 1; soft tissue, n = 1; lymph nodes, n = 2; blood, n = 1)  
143 (Table 1 and S1). For routine diagnostic purposes, species identification was performed  
144 using GenoType NTM-DR line probe assays (HAIN Lifescience, Nehren, Germany) and  
145 sequencing of the 16S and *rpoB* genes as described previously (Adekambi et al., 2003).

146

### 147 *Whole genome sequencing and genome assemblies*

148

149 Genomic DNA (gDNA) of the 15 MAB clinical isolates was extracted from solid  
150 cultures using a Centriconium bromide chloroform DNA extraction protocol as previously  
151 described (De Almeida et al., 2013). DNA libraries were constructed with the Nextera XT  
152 kit from Illumina and sequenced on the Illumina MiSeq benchtop platform with a v3  
153 chemistry paired –end run and a read length of 2x300 bp. We processed the resulting reads  
154 with Trimmomatic (Bolger et al., 2014), clipping the Illumina adapter sequences and  
155 trimming the reads with a sliding window of 20 bp looking for quality >30 and discarding  
156 all reads shorter than 100 bp. Trimmed reads were used to construct *de novo* assemblies  
157 using SPADIS (Nurk et al., 2013) with default parameters and the --careful option enabled.  
158 Then, each assembly was analyzed with RAST (Aziz et al., 2008) to obtain all the open  
159 reading frames (ORFs). Additionally, we predicted the ORFs from the deposited genome  
160 sequence of the *M. abscessus* ATCC 19977 type strain (GenBank CU458896.1)  
161 (Supplementary Table S1).

162

### 163 *Secretome prediction*

164

165 The complete set of predicted ORFs was independently analyzed for each genome  
166 using the bioinformatics pipeline previously reported by Cornejo-Granados et al., 2017 and  
167 summarized in Supplementary Fig. S1. Briefly, we used six different feature-based tools  
168 (SignalP, SecretomeP, LipoP, TatP, TMHMM and Phobius) (Bendtsen et al., 2005a; 2005b;  
169 Petersen et al., 2011; Sonnhammer et al., 1998) (Juncker et al., 2003; Käll et al., 2007) to  
170 identify ES proteins by the different secretion pathways and to remove the ones that had

171 transmembrane domains (Supplementary Fig. S1). The proteins assigned as not-secreted  
172 (non-ES) were further classified into transmembrane proteins (TM) if they showed the  
173 presence of transmembrane domains with TMHMM 2.0 (Sonnhammer et al., 1998), and  
174 into intracellular proteins (incell) if they did not contain any transmembrane domains.

175

### 176 *Annotation and comparative analysis of secreted proteins*

177

178 To assign functional annotations to the proteins present in our genomes, we  
179 performed a BLASTP query of those proteins against the non-redundant (nr) complete  
180 database using Blast2GO (Conesa and Götzt, 2008) with an E-value cut-off set at 1.0E-3.  
181 Furthermore, all proteins were associated with protein families through InterProScan  
182 (Zdobnov and Apweiler, 2001) and functionally mapped to Gene Ontology (GO) terms by  
183 setting the following parameters: E-value-hi-filter: 1.0E-3; Annotation cut-off: 55; GO  
184 weight: 5 and Hsp-Hit Coverage cut-off: 0. Blast2GO was then used to identify over- and  
185 under-represented GO and Enzyme Commission (EC) numbers in the ES proteins by  
186 setting the significance filter p-value to  $\leq 0.05$ . Also, we used the KEGG Automatic  
187 Annotation Server (KAAS) database (Moriya et al., 2007) to assign the pathway annotation  
188 to the secreted proteins using the BBH (bidirectional best hit) method and the gene data set  
189 assigned to *Mycobacterium*.

190 To determine differences between the predicted secretomes in relation to MAB  
191 subspecies and morphotype, we established core secretomes by performing a bidirectional  
192 best-hit BLASTP search (E-value 1.0E-3) between the ES proteins of all genomes  
193 belonging to the respective subspecies and morphotypes. Then, we identified the shared and  
194 unique proteins for each comparison. Additionally, we determined the ES proteins shared  
195 between the MAB reference strain ATCC 19977 and *M. tuberculosis* H37Rv predicted and  
196 experimental secretomes (Cornejo-Granados et al., 2017). The resulting shared proteins  
197 were further investigated for sequence similarities against known drug targets available on  
198 the Drug Bank database (<http://www.drugbank.ca/>), setting the E-value to 1.0E-3 and all  
199 other options to default. In Supplementary Table S2, we show all proteins that have  
200 similarity with an approved drug target, as well as the drugs that can affect said target.

201 Additionally, we analyzed the presence of the core secretomes in twenty *M.*  
202 *abscessus* genomes per subspecies downloaded from NCBI (Supplementary Table S3). To  
203 this end, each downloaded genome was analyzed with RAST to obtain all the open reading  
204 frames (ORFs). Next, we performed a BLASTP search (E-value 1.0E-3) of each core  
205 secretome against each genome of the corresponding subspecies, and all hit proteins were  
206 considered homologs.

207

### 208 *Calculation of the Abundance of Antigenic Regions*

209

210 The Abundance of Antigenic Regions (AAR) value is used to estimate the antigenic density  
211 of a protein by calculating the number of antigenic regions and normalizing it to the  
212 sequence length (Gomez et al., 2015). Of note, proteins with higher antigenic densities have  
213 lower AAR values. For this study, we calculated the AAR value for each protein in each  
214 data set using the Secret-AAR web-server  
215 (<http://microbiomics.ibt.unam.mx/tools/aar/index.php>) and reported the average unless  
216 stated otherwise (Cornejo-Granados et al., 2018). Then, we used a Mann-Whitney

217 statistical test to establish any significant differences between the AAR values of the  
218 different protein data sets.

219

### 220 **Data availability**

221 The reference genomes analyzed for *M. abscessus* ATCC19977 and *M. tuberculosis* H37Rv  
222 were taken from NCBI, under GenBank IDs CU458896.1 and NC\_000962.3, respectively.  
223 The Whole Genome Shotgun project has been deposited at NCBI, under BioProject  
224 PRJNA646278. All the predicted secretomes were deposited in the Secret-AAR web-server  
225 (<http://microbiomics.ibt.unam.mx/tools/aar/index.php>).

226

227

## 228 **Results**

229

### 230 **Genome assembly, secretome prediction and annotation**

231

232 We sequenced the genomes of fifteen pulmonary and extrapulmonary (skin, tissue,  
233 and lymph node, blood) MAB isolates obtained from patients in Germany comprising all  
234 three MAB subspecies (Table 1 and S1). For each genome, we obtained an average of  
235 2,601,444 quality-filtered reads. After *de novo* assembly, we obtained from 38 to 78 contigs  
236 (mean = 58 contigs) with genome coverage of 217- to 368-fold (mean = 310-fold) and with  
237 an average of 5,082 total proteins per genome (Supplementary Table S4).

238 We used a bioinformatics pipeline previously reported by our group (Cornejo-Granados et  
239 al., 2017) to predict the full secretome of all MAB clinical isolates and the widely used  
240 reference strain *M. abscessus* ATCC 19977 (GenBank CU458896.1) (Supplementary Fig.  
241 S1). We obtained an average of 939 ES proteins per genome, representing ~18% of the  
242 total proteome (Table 1). The predicted secretome for the MAB reference strain consisted  
243 of 886 proteins. From these, all the proteins showed a BLASTP hit against the NR  
244 database, and only 494 (55.8%) could be annotated with GO terms.

245 We analyzed the over-representation of GO terms in the secretome of *M. abscessus*  
246 ATCC 19977 as compared to the whole genome. The most significantly enriched GO-terms  
247 were: “lytic vacuole” ( $p = 9.37E-04$ ) and “fungal-type vacuole” ( $p = 0.004$ ) in Cellular  
248 Component (Fig. 1A), “serine-type carboxypeptidase” ( $p = 1.83E-04$ ), and “serine-type D-  
249 Ala-D-Ala carboxypeptidase” ( $p = 1.83E-04$ ) activities in Molecular Function (Fig. 1B) and  
250 “response to inorganic substance” ( $p = 5.68E-04$ ) and “cellular response to oxygen radical”  
251 ( $p = 0.001$ ) in the Biological Process category (Fig. 1C). The KEGG pathway mapping of  
252 the ES proteins showed that 214 proteins (24.2 %) could be assigned to 100 different  
253 KEGG pathways (Table 2), with the ABC transporter pathway being the most abundant ( $n =$   
254 13, 1.47 %). Additionally, serine-type D-Ala-D-Ala carboxypeptidases ( $p = 1.83E-04$ ) and  
255 peptidases ( $p = 8.40E-04$ ) were the most significantly abundant enzymes according to the  
256 Enzyme Commission (EC) Classes (Figure S2), while the Mce/MiaD and PknH-like  
257 extracellular domains were the most enriched protein domains (Table 3). Of note,  
258 comparably few sequences were assigned to the PE/PPE category ( $n = 3$ ). Notably, after  
259 comparing the predicted secretome of *M. abscessus* ATCC 19977 with a list of essential  
260 genes published by (Laencina et al., 2018), we found that 99 (11.17 %) of the predicted ES  
261 proteins, corresponded to essential proteins required for *in vitro* growth.

262

### 263 **Comparison of *M. abscessus* subspecies core secretomes**

264

265 We analyzed the differences between the predicted secretomes of the three MAB  
266 subspecies. To this end, we defined the core secretome of each subspecies as the set of  
267 proteins shared between all secretomes of isolates belonging to MAB<sub>A</sub>, MAB<sub>B</sub>, and MAB<sub>M</sub>,  
268 respectively. The resulting core secretomes contained 735 (MAB<sub>A</sub>), 794 (MAB<sub>B</sub>), and 813  
269 (MAB<sub>M</sub>) proteins (Fig 2A).

270 Given that our study considered a limited number of de novo assembled genomes,  
271 we additionally compared the predicted core secretomes to sixty additional MAB genomes  
272 available in NCBI (Supplementary Table S3). We found that an average of 99.78%, 99.12%,  
273 and 98.59% of our core secretomes was also present in the investigated additional MAB<sub>A</sub>,  
274 MAB<sub>B</sub>, and MAB<sub>M</sub> genomes, respectively, further corroborating the validity of the  
275 predicted subspecies core secretomes for other MAB isolates.

276 We then determined the respective AAR values to estimate antigenic densities for  
277 the protein sets in each core secretome. The average AAR values from most to least  
278 antigenic was: 40.24 for MAB<sub>A</sub>, 40.75 for MAB<sub>B</sub>, and 41.38 for MAB<sub>M</sub> with no  
279 statistically significant difference between these values.

280 Next, we identified the ES proteins shared between the MAB<sub>A</sub>, MAB<sub>B</sub>, and MAB<sub>M</sub>  
281 core secretomes. We found that 704 proteins (86.5 %) were shared among MAB<sub>A</sub>, MAB<sub>B</sub>,  
282 and MAB<sub>M</sub> with an AAR value of 41.17 (Fig. 2B). The AAR values for the protein sets  
283 exclusively found in the MAB<sub>A</sub>, MAB<sub>B</sub>, or MAB<sub>M</sub> secretome were 33.58, 41.22, and 43.13,  
284 respectively, with the MAB<sub>A</sub> dataset showing a significantly lower AAR value indicating  
285 higher antigenicity than the others ( $p < 0.1$ ; Fig. 2B).

286

### 287 *Differences in core secretomes between R and S morphotypes*

288

289 As MAB isolates with R and S morphotypes show differences in virulence and  
290 pathogenicity, we compared the predicted core secretomes of R and S isolates (Fig. 3). We  
291 observed that the core secretomes of R variants were larger (840, 924 and 845 proteins for  
292 MAB<sub>A</sub>, MAB<sub>M</sub>, and MAB<sub>B</sub>) than those of the investigated S variants (764, 872 and 833  
293 proteins, respectively) with no significant differences in antigenic densities as per mean  
294 AAR values (Fig. 3). Intra-subspecies comparison of S and R secretomes revealed that 96.4  
295 %, 90.7% and 95% of the identified ES proteins were found in both R and S morphotypes  
296 for MAB<sub>A</sub>, MAB<sub>M</sub> and MAB<sub>B</sub> respectively. The number of unique proteins was larger in  
297 the core secretome of the R morphotypes ( $n = 93, 109, \text{ and } 48$  for MAB<sub>A</sub>, MAB<sub>M</sub>, and  
298 MAB<sub>B</sub>) as compared to the S morphotypes ( $n = 9, 76, \text{ and } 35$ , respectively; Fig.3).

299 Interestingly, antigenic densities for the unique ES proteins of the R morphotypes were  
300 higher (AAR = 40.84, 36.71, and 35.59 for MAB<sub>A</sub>, MAB<sub>M</sub>, and MAB<sub>B</sub>) than for the  
301 proteins exclusive to the S morphotypes irrespective of the subspecies (AAR = 45.43,  
302 37.72, and 42.14; Fig. 3). To assess if the AAR values of these specific protein sets were  
303 different from same-sized protein sets randomly chosen from the respective core  
304 secretomes, we created 1000 random sets of 109, 93, 76, 48, 35 and 9 proteins and  
305 calculated the AAR value for each set. Then, we determined an empirical p-value based on  
306 the number of random protein sets that equaled or exceeded the AAR value for each protein  
307 dataset as was previously suggested by Cornejo-Granados et al., 2017. We found that the  
308 ES proteins exclusive to the R morphotypes of MAB<sub>M</sub> and MAB<sub>B</sub> had significantly ( $p$   
309  $< 0.05$ ) higher antigenic densities than randomly constructed protein sets (Supplementary  
310 Table S5).

311 Finally, we determined the MAB core secretomes by sample origin (pulmonary,  
312 extrapulmonary, blood). This resulted in 706 ES proteins shared among the ten pulmonary  
313 isolates, 758 proteins shared among the four extrapulmonary isolates, and 885 proteins for  
314 the single isolate grown from a blood sample. However, as per the GO, KEGG, and  
315 antigenicity analyses, we did not find any distinct characteristics specific to either sample  
316 source and, hence, type of infection.

317

### 318 *Antigenicity of ES and non-ES proteins*

319

320 It has previously been reported for different microorganisms including MTB that ES  
321 proteins tend to be more antigenic than non-ES proteins (Cornejo-Granados et al., 2017;  
322 Gomez et al., 2015; Wang et al., 2015). We thus tested if this was also true for the  
323 investigated MAB isolates. First, we found that the antigenic densities as indicated by mean  
324 AAR values were very similar among all isolates irrespective of subspecies or morphotype  
325 within the same cell compartment, i.e. for ES, non-ES, intracellular (incell) and  
326 transmembrane (TM) proteins (Fig. 4). Second, we found that antigenic densities were  
327 significantly higher in ES proteins as compared to non-ES proteins in all isolates (AAR =  
328 40.57 and 43.60, respectively; p-value < 0.0001) (Fig. 4). However, within the non-ES  
329 category, incell proteins showed even higher antigenic densities (AAR = 39.04) than the  
330 predicted ES proteins (p < 0.0001) while the lowest overall antigenic densities were  
331 observed for the TM category (AAR = 59.23; p < 0.0001).

332

333

### 334 *Comparison of M. abscessus and M. tuberculosis secretomes*

335

336 Lastly, we compared the predicted secretome of *M. abscessus* ATCC 19977 against  
337 the previously reported secretome of *M. tuberculosis* H37Rv (Cornejo-Granados et al.,  
338 2017). We observed that the *M. abscessus* secretome was predicted to be almost equally  
339 antigenic (AAR=40.78) than the *M. tuberculosis* secretome (AAR=40.63) (Fig. 5). We  
340 found 337 MAB ES proteins (38.04%) with homology to proteins in the predicted MTB  
341 secretome (Fig. 5). In addition, 222 of these proteins had sequence homology with proteins  
342 experimentally reported as secreted in MTB (comparable experimental secretome data for  
343 MAB was not available to us) (Cornejo-Granados et al., 2017) (Supplementary Table S6).  
344 Furthermore, we determined the average AAR value of the 680 ES proteins shared among  
345 the fifteen MAB isolates (AAR = 41.53). This value means that antigenic density was  
346 lower than for the predicted secretome of *M. tuberculosis* H37Rv (AAR = 40.63) and two  
347 clinical *M. tuberculosis* isolates belonging to the Beijing lineage (isolate C3 AAR = 37.51  
348 and isolate C4 AAR = 37.54,) (Table 4) (Cornejo-Granados et al., 2017). Finally, we  
349 identified 17 ES proteins with homologues in both MAB and *M. tuberculosis*, which are  
350 listed as targets for various FDA approved drugs (Supplementary Table S2).

351

## 352 **Discussion**

353

354 This is the first study that proposes a method for prediction of MAB secretomes  
355 based on fifteen clinical MAB isolates and the *M. abscessus* ATCC 19977 reference strain.  
356 Our results show that an average of 18% (939 proteins) of the total proteins encoded in the  
357 MAB core genome carry sequence patterns indicative of secretion. Notably, this percentage



358 is 6% larger than the proportion previously reported for several MTB isolates (~12%)  
359 (Cornejo-Granados et al., 2017). Nearly 200 species of mycobacteria have been identified  
360 with diverse lifestyles and a high degree of morphological, biochemical, and physiological  
361 diversity and a comparative genome analysis suggests that only a relatively small number  
362 of genes (1080) are shared between several *Mycobacterium* species (Malhotra et al., 2017;  
363 Tortoli et al., 2017). Moreover, loss of ancestral genes is a well described phenomenon in  
364 slowly growing mycobacteria such as MTB and, in particular, *M. leprae* (Bachmann et al.,  
365 2019). In contrast, rapidly growing NTM such as MAB are considered to represent a more  
366 ancient evolutionary state, with larger genomes than those of MTB (Bachmann et al., 2019;  
367 Malhotra et al., 2017). Thus, it is not surprising that we found a larger number of ES  
368 proteins in MAB than MTB. Furthermore, the increased abundance of ES proteins in MAB  
369 as compared to MTB could be related to the ability of MAB to cause a different spectrum  
370 of disease and to adapt to different environmental settings requiring frequent interaction  
371 with a wide variety of host cells and organisms competing for the same ecological niche,  
372 likely involving cross species exchange of genetic information, for example by plasmid  
373 transfer (Ripoll et al., 2009; Ryan and Byrd, 2018; Waman et al., 2019). A similar  
374 hypothesis has been suggested for fungal secretomes (O'Toole et al., 2013).

375  
376 The GO and KEGG pathway annotations of the secretomes of *M. abscessus* ATCC 19977  
377 and the MAB clinical isolates showed enrichment consistent with the characterization of  
378 previously reported mycobacterial secretomes (Cornejo-Granados et al., 2017; Gomez et al.,  
379 2015). Interestingly and in line with the increased secretome size as compared to MTB, the  
380 KEGG pathway analysis showed a high abundance of the Quorum sensing pathway for the  
381 predicted MAB secretomes, which was not present in our previous MTB secretome  
382 pathway analysis (Cornejo-Granados et al., 2017). The presence of a Quorum sensing  
383 pathway would be another similarity shared between MAB and non-mycobacterial  
384 pathogens commonly affecting patients with chronic lung disease such as *Pseudomonas*  
385 *aeruginosa* (Mukherjee and Bassler, 2019). In addition, it could be related to the ability of  
386 MAB to form biofilms (Clary et al., 2018; Orme and Ordway, 2014), further contributing to  
387 the capacity of MAB to tolerate antibiotics and to persist over long periods in the  
388 environment (Faria et al., 2015; Hunt-Serracin et al., 2019; Kulka et al., 2012; Maurer et al.,  
389 2014a).

390 The InterPro annotation showed that Mce domains were the most abundant (2.14 %)   
391 domains in the MAB reference secretome, while PPE and PE-PGRS domains only  
392 corresponded to 0.3 % of the ES protein sequences. This tendency is contrary to our  
393 observations for MTB (Cornejo-Granados et al., 2017), where the PPE and PE-PGRS  
394 domains accounted for ~12% of the secreted proteins and the Mce domains for only 0.5%.  
395 The lower quantity of predicted PE/PPE proteins in MAB was somewhat expected. *M.*  
396 *tuberculosis* has five ESX secretion systems, four of which encode PE/PPE proteins, while  
397 MAB has only two (ESX-3 and ESX-4) of which only the ESX-3 operon includes PE/PPE  
398 genes (Dumas et al., 2016). In contrast, Mce domains are known for participating in host  
399 cell entry by mycobacteria (Kumar et al., 2005). Thus, their higher abundance in MAB as  
400 compared to MTB highlights the importance of this pathway for MAB survival within the  
401 host. It needs to be mentioned though that Kumar et al., 2005, also suggested that in low  
402 virulence bacteria, transport activities could be the primary function of Mce operons  
403 (Kumar et al., 2005).

404 To compare the predicted secretomes according to colony morphotype, we first  
405 established the core secretome for the R and S variants per subspecies, thus eliminating  
406 individualities among the different isolates (Fig. 3). The high overall agreement between  
407 the core secretomes for both morphotypes of approximately 90 % was expected,  
408 considering the fact that R variants can arise from the S morphotypes during persistent  
409 infection by loss of surface-exposed GPLs caused by mutations in the GPL synthesis  
410 pathway (Bernut et al., 2014; Catherinot et al., 2007; Roux et al., 2016; Ryan and Byrd,  
411 2018). However, both the higher number and the higher antigenic densities (lower AAR  
412 values) of the ES proteins exclusively found in R variants indicate that additional genetic  
413 changes may evolve during S-to-R conversion. Moreover, this observation raises the  
414 question whether some strains with additional genetic traits associated with virulence are  
415 able to undergo S-to-R conversion and cause disease due to R variants more easily than  
416 others. Genomic studies involving sequentially isolated S and R variants of the same strain  
417 obtained from individual patients over time will be required to better characterize the  
418 microevolution of MAB strains within the chronically infected host.

419 Similarly, the fact that MAB causes both chronic pulmonary disease (with R  
420 variants sometimes increasing over time) and extrapulmonary manifestations (mostly  
421 caused by S variants) led us to investigate whether differences exist in the predicted  
422 secretomes of isolates related to these clinical presentations. The absence of major  
423 differences in the GO, KEGG, and antigenicity analyses suggest that secretome variations  
424 do not influence MAB tissue tropism. Consequently, host characteristics such as severe  
425 immunosuppression may be the main driver for invasive MAB infections. Likewise, in the  
426 case of tissue infections, which often occur following surgical interventions, insufficient  
427 hygiene procedures and sterilization protocols for surgical equipment appear to be more  
428 relevant than pathobiological traits such as the secretome intrinsic to the causative MAB  
429 isolate (Maurer et al., 2014b)

430 Lastly, we observed that the predicted secretomes of all investigated clinical MAB  
431 isolates were less antigenic than the secretomes of *M. tuberculosis* H37Rv and two clinical  
432 *M. tuberculosis* isolates. Additionally, although there was no statistical difference, the  
433 isolates with a rough phenotype tended to be more antigenic than the isolates with smooth  
434 phenotype. Previous evidence with *M. tuberculosis* (Cornejo-Granados et al., 2017) showed  
435 that clinical isolates from the Beijing phenotype showed increased virulence and less  
436 antigenic secretomes than the reference strain H37Rv. Thus, the diminished antigenicity of  
437 MAB could be viewed as a virulence trait in itself as it would support colonization of the  
438 host for extended time periods without immediate progression into clinical disease.  
439 However, further experimental tests on antigenicity are needed to demonstrate this  
440 observation.

441 This study represents the first systematic prediction and *in silico* characterization of  
442 the MAB secretome. We acknowledge that an important constraint of this study is the  
443 limited total number of genomes analyzed per subspecies and biological source. Thus, care  
444 must be taken to not overinterpret the findings related to sample subcategories such as  
445 subspecies and morphotypes. Also, published experimental data on MAB secretomes are  
446 very limited and no systematic validation of the *in silico* findings reported herein could be  
447 performed against such datasets. Although, more research will be needed to determine  
448 experimental secretomes in NTM, our study demonstrates that using bioinformatics  
449 strategies can help to broadly explore mycobacterial secretomes including those of clinical  
450 isolates and to tailor subsequent, complex and time-consuming experimental approaches

451 accordingly. This approach can support a systematic investigation of mycobacterial  
452 secretomes exploring candidate proteins suitable for developing new vaccines and  
453 diagnostic markers to distinguish between colonization and infection.

454

455

456

457

458

459

460

461

462

463

464

465

466

467

468

469

470

471

472

473

474

475

476

477

478

479

480

481

482

483

484

485

486

487

488

489

490

491

492

493

494

495

496

497

498 **Tables**

499 Table 1| Clinical isolates metadata and number of ES proteins.

| Strain                                           | Genome ID                                                | Origin                  | Phenotype | Total predicted proteins | ES proteins | % ES proteins |
|--------------------------------------------------|----------------------------------------------------------|-------------------------|-----------|--------------------------|-------------|---------------|
| <i>M. abscessus</i><br><i>subsp. abscessus</i>   | 4549-15                                                  | sputum                  | rough     | 5,105                    | 929         | 18            |
|                                                  | 11351-15                                                 | sputum                  | rough     | 5,138                    | 966         | 19            |
|                                                  | 8844-15                                                  | skin                    | smooth    | 4,854                    | 956         | 20            |
|                                                  | 3563-15                                                  | sputum                  | smooth    | 5,239                    | 968         | 18            |
|                                                  | 12389-15                                                 | sputum                  | smooth    | 5,276                    | 990         | 19            |
|                                                  | 2677-16                                                  | sputum                  | smooth    | 4,900                    | 919         | 19            |
|                                                  | 2572-17                                                  | tissue (breast implant) | NA        | 4,847                    | 874         | 18            |
| <i>M. abscessus</i><br><i>subsp. massiliense</i> | 14479-15                                                 | sputum                  | rough     | 5,120                    | 962         | 19            |
|                                                  | 10896-16                                                 | sputum                  | rough     | 5,109                    | 950         | 19            |
|                                                  | 10003-15                                                 | sputum                  | smooth    | 4,835                    | 891         | 18            |
|                                                  | 16155-15                                                 | sputum                  | smooth    | 4,884                    | 898         | 18            |
| <i>M. abscessus</i><br><i>subsp. bolletii</i>    | 11702-16                                                 | sputum                  | rough     | 5,079                    | 931         | 18            |
|                                                  | 713-16                                                   | lymph node              | rough     | 5,456                    | 1,037       | 19            |
|                                                  | 7742-15                                                  | blood culture           | smooth    | 4,913                    | 885         | 18            |
|                                                  | 13116-16                                                 | lymph node              | smooth    | 5,305                    | 990         | 19            |
| <i>M. abscessus</i><br><i>subsp. abscessus</i>   | reference strain<br>ATCC19977<br>(GenBank<br>CU458896.1) | -                       | -         | 4,942                    | 886         | 18            |
| <i>M. tuberculosis</i><br><i>H37Rv</i>           | reference strain<br>(GenBank<br>AL123456.3)              | -                       | -         | 4,337                    | 548         | 13            |

500  
501  
502  
503  
504  
505  
506  
507  
508  
509  
510  
511  
512

513  
514  
515  
516

Table 2. | Top 10 KEGG pathways assigned for *M. abscessus* ATCC19977 ES proteins.

| Ranking | Pathway name                            | Number of represented ES proteins (%) |
|---------|-----------------------------------------|---------------------------------------|
| 1       | ABC transporters                        | 13 (1.47)                             |
| 2       | Two-component system                    | 9 (1.02)                              |
| 3       | Quorum sensing                          | 6 (0.68)                              |
| 4       | Oxidative phosphorylation               | 4 (0.45)                              |
| 5       | Sulfur metabolism                       | 4 (0.45)                              |
| 6       | Glycerolipid metabolism                 | 4 (0.45)                              |
| 7       | Peptidoglycan biosynthesis              | 4 (0.45)                              |
| 8       | Protein export                          | 4 (0.45)                              |
| 9       | Starch and sucrose metabolism           | 3 (0.34)                              |
| 10      | Glyoxylate and dicarboxylate metabolism | 3 (0.34)                              |

517  
518  
519  
520

Table 3| Top 10 most represented protein domains in *M. abscessus* ATCC19977 secretome.

| InterProcode | InterPro description                                      | Number of ES proteins (%) |
|--------------|-----------------------------------------------------------|---------------------------|
| IPR003399    | Mce/MlaD                                                  | 19 (2.14)                 |
| IPR026954    | PknH-like extracellular domain                            | 15 (1.69)                 |
| IPR032407    | Haemophore, haem-binding                                  | 10 (1.13)                 |
| IPR020846    | Major facilitator superfamily domain                      | 7 (0.79)                  |
| IPR013766    | Thioredoxin domain                                        | 6 (0.68)                  |
| IPR000064    | Endopeptidase, NLPC/P60 domain                            | 6 (0.68)                  |
| IPR001638    | Solute-binding protein family 3/N-terminal domain of MltF | 6 (0.68)                  |
| IPR000675    | Cutinase/acetylxyln esterase                              | 6 (0.68)                  |
| IPR005490    | L,D-transpeptidase catalytic domain                       | 5 (0.56)                  |
| IPR000073    | Alpha/beta hydrolase fold-1                               | 5 (0.56)                  |

521  
522  
523  
524  
525  
526  
527  
528  
529  
530  
531

532

533 Table 4 | Abundance of Antigenic Regions (AAR) for *M. abscessus* and *M. tuberculosis*  
534 strains.

535

| Strain                                     | Number of proteins in the dataset | Average AAR value |
|--------------------------------------------|-----------------------------------|-------------------|
| <i>M. tuberculosis</i> Beijing isolate C3* | 553                               | 37.52             |
| <i>M. tuberculosis</i> Beijing isolate C4* | 519                               | 37.55             |
| <i>M. bovis</i> BCG Pasteur                | 564                               | 38.99             |
| <b><i>M. abscessus</i> ATCC 19977</b>      | <b>886</b>                        | <b>40.78</b>      |
| <i>M. tuberculosis</i> H37Rv               | 548                               | 40.63             |
| <i>M. abscessus</i> clinical isolates      | 680                               | 41.54             |
|                                            |                                   |                   |

536

\* both Beijing isolates were previously reported in Cornejo-Granados et al., 2017.

537

538

539

540

#### Figure Legends

541

542 **Figure 1. GO enrichment analysis for the *M. abscessus* ATCC 19977 reference strain.**

543 Top 10 most enriched GO terms for the *M. abscessus* ATCC 19977 secretome (blue) and  
544 complete genome (red) in three categories: A) Cellular Component, B) Molecular Function  
545 and C) Biological Process.

546

547 **Figure 2. Venn diagram between the core secretomes of the three *M. abscessus***

548 ***subspecies*.** A) Number of total proteins contained in the core secretome of each subspecies.

549 B) Shared and unique proteins between the three subspecies as per BLASTP (E-value 1.0E-  
550 3).

551

552 **Figure 3. Venn diagram between the core secretomes of the three *M. abscessus***

553 ***subspecies* by colony morphotype.** We used BLASTP (E-value 1.0E-3) to assess the core

554 secretomes for isolates with rough and smooth colony morphotypes A) *M. abscessus* subsp.  
555 *abscessus*, B) *M. abscessus* subsp. *massiliense* and C) *M. abscessus* subsp. *bolletii*.

556

557 **Figure 4. Comparison between AAR values for Excreted/Secreted (ES), non**  
558 **Excreted/Secreted (non-ES), intracellular (incell) and transmembrane (TM) proteins.**

559 AAR values were calculated for each of the 15 genomes sequenced. The X-axis shows the  
560 cellular compartment and the Y-axis shows AAR values for the genomes of each subspecies:

561 *M. abscessus* subsp. *abscessus* (green), *M. abscessus* subsp. *bolletii* (blue), *M. abscessus*

562 subsp. *massiliense* (purple), *M. abscessus* ATCC19977 (red) and *M. tuberculosis* H37Rv

563 (orange). Mann-Whitney tests were performed to compare the AAR of each group with a

564 confidence level of 99% (\*\*\*,  $p < 0.001$ ).

565

566 **Figure 5. Venn diagram between the predicted secretomes of *M. tuberculosis* H37Rv**  
567 **and *M. abscessus* ATCC 19977.** We used BLASTP (E-value 1.0E-3) to compare the  
568 complete secretomes of both species.

569

### 570 **Acknowledgements**

571 We would like to thank Julia Zallet and Vanessa Mohr for excellent technical assistance and  
572 Henrik Nielsen for his assistance with the SecretomeP software. Parts of this work have been  
573 supported by the German Center for Infection Research and Grants by Joachim Herz  
574 Foundation, Hamburg, and Mukoviszidose Institut gGmbH, Bonn, the research and  
575 development arm of the German Cystic Fibrosis Association Mukoviszidose e.V. to F.P.M.  
576 We acknowledge the support provided by CONACyT grant CB- 2013-223279 and  
577 SALUD-2014-C01-234188 to A.O.L. This research also received support by the DGAPA  
578 PAPIIT UNAM (IN215520) to A.O.L. F.C.G. acknowledges the support of CONACyT as a  
579 Postgraduate fellow.

580

581

582

### 583 **References**

- 584 Abeles, S. R., and Pride, D. T. (2014). Molecular Bases and Role of Viruses in the Human  
585 Microbiome. *Journal of Molecular Biology* 426, 3892–3906.  
586 doi:10.1016/j.jmb.2014.07.002.
- 587 Adekambi, T., Colson, P., and Drancourt, M. (2003). rpoB-based identification of  
588 nonpigmented and late-pigmenting rapidly growing mycobacteria. *Journal of Clinical*  
589 *Microbiology* 41, 5699–5708. doi:10.1128/jcm.41.12.5699-5708.2003.
- 590 Aziz, R. K., Bartels, D., Best, A. A., DeJongh, M., Disz, T., Edwards, R. A., et al. (2008).  
591 The RAST Server: rapid annotations using subsystems technology. *BMC Genomics* 9,  
592 75. doi:10.1186/1471-2164-9-75.
- 593 Bachmann, N. L., Salamzade, R., Manson, A. L., Whittington, R., Sintchenko, V., Earl, A.  
594 M., et al. (2019). Key Transitions in the Evolution of Rapid and Slow Growing  
595 Mycobacteria Identified by Comparative Genomics. *Front. Microbiol.* 10, 3019.  
596 doi:10.3389/fmicb.2019.03019.
- 597 Bendtsen, J. D., Kiemer, L., Fausbøll, A., and Brunak, S. (2005a). Non-classical protein  
598 secretion in bacteria. *BMC Microbiol* 5, 58. doi:10.1186/1471-2180-5-58.
- 599 Bendtsen, J. D., Nielsen, H., Widdick, D., Palmer, T., and Brunak, S. (2005b). Prediction of  
600 twin-arginine signal peptides. *BMC Bioinformatics* 6, 167. doi:10.1186/1471-2105-6-  
601 167.
- 602 Bernut, A., Herrmann, J.-L., Kissa, K., Dubremetz, J.-F., Gaillard, J.-L., Lutfalla, G., et al.  
603 (2014). Mycobacterium abscessus cording prevents phagocytosis and promotes abscess  
604 formation. *Proc. Natl. Acad. Sci. U.S.A.* 111, E943–52. doi:10.1073/pnas.1321390111.
- 605 Bolger, A. M., Lohse, M., and Usadel, B. (2014). Trimmomatic: a flexible trimmer for  
606 Illumina sequence data. *Bioinformatics* 30, 2114–2120.

- 607 doi:10.1093/bioinformatics/btu170.
- 608 Catherinot, E., Clarissou, J., Etienne, G., Ripoll, F., Emile, J. F., Daffé, M., et al. (2007).  
609 Hypervirulence of a rough variant of the Mycobacterium abscessus type strain.  
610 *Infection and Immunity* 75, 1055–1058. doi:10.1128/IAI.00835-06.
- 611 Chen, J., Zhao, L., Mao, Y., Ye, M., Guo, Q., Zhang, Y., et al. (2019). Clinical Efficacy  
612 and Adverse Effects of Antibiotics Used to Treat Mycobacterium abscessus Pulmonary  
613 Disease. *Front. Microbiol.* 10, 1977. doi:10.3389/fmicb.2019.01977.
- 614 Clary, G., Sasindran, S. J., Nesbitt, N., Mason, L., Cole, S., Azad, A., et al. (2018).  
615 Mycobacterium abscessus Smooth and Rough Morphotypes Form Antimicrobial-  
616 Tolerant Biofilm Phenotypes but Are Killed by Acetic Acid. *Antimicrobial Agents and*  
617 *Chemotherapy* 62, 117. doi:10.1128/AAC.01782-17.
- 618 Conesa, A., and Götz, S. (2008). Blast2GO: A comprehensive suite for functional analysis  
619 in plant genomics. *Int J Plant Genomics* 2008, 619832. doi:10.1155/2008/619832.
- 620 Cornejo-Granados, F., Hurtado-Ramírez, J. M., Hernandez-Pando, R., and Ochoa-Leyva, A.  
621 (2018). Secret-AAR: a web server to assess the antigenic density of proteins and  
622 homology search against bacterial and parasite secretome proteins. *Genomics*.  
623 doi:10.1016/j.ygeno.2018.10.007.
- 624 Cornejo-Granados, F., Zatarain-Barrón, Z. L., Cantu-Robles, V. A., Mendoza-Vargas, A.,  
625 Molina-Romero, C., Sánchez, F., et al. (2017). Secretome Prediction of Two M.  
626 tuberculosis Clinical Isolates Reveals Their High Antigenic Density and Potential Drug  
627 Targets. *Front. Microbiol.* 8, 128. doi:10.3389/fmicb.2017.00128.
- 628 Daugelat, S., Guile, H., Schoel, B., and Kaufmann, S. H. E. (1992). Secreted Antigens of  
629 Mycobacterium tuberculosis: Characterization with T Lymphocytes from Patients and  
630 Contacts after Two-Dimensional Separation. *Journal of Infectious Diseases* 166, 186–  
631 190. doi:10.1093/infdis/166.1.186.
- 632 De Almeida, I. N., Da Silva Carvalho, W., Rossetti, M. L., Costa, E. R. D., and De Miranda,  
633 S. S. (2013). Evaluation of six different DNA extraction methods for detection of  
634 Mycobacterium tuberculosis by means of PCR-IS6110: preliminary study. *BMC*  
635 *Research Notes* 6, 561–6. doi:10.1186/1756-0500-6-561.
- 636 Dumas, E., Christina Boritsch, E., Vandebogaert, M., Rodríguez de la Vega, R. C.,  
637 Thiberge, J.-M., Caro, V., et al. (2016). Mycobacterial Pan-Genome Analysis Suggests  
638 Important Role of Plasmids in the Radiation of Type VII Secretion Systems. *Genome*  
639 *Biol Evol* 8, 387–402. doi:10.1093/gbe/evw001.
- 640 Faria, S., Joao, I., and Jordao, L. (2015). General Overview on Nontuberculous  
641 Mycobacteria, Biofilms, and Human Infection. *J Pathog* 2015, 809014–10.  
642 doi:10.1155/2015/809014.
- 643 Gomez, S., Adalid-Peralta, L., Palafox-Fonseca, H., Cantu-Robles, V. A., Soberón, X.,



- 644 Sciutto, E., et al. (2015). Genome analysis of Excretory/Secretory proteins in *Taenia*  
645 *solium* reveals their Abundance of Antigenic Regions (AAR). *Sci. Rep.* 5, 9683.  
646 doi:10.1038/srep09683.
- 647 Gupta, M. K., Subramanian, V., and Yadav, J. S. (2009). Immunoproteomic identification  
648 of secretory and subcellular protein antigens and functional evaluation of the secretome  
649 fraction of *Mycobacterium immunogenum*, a newly recognized species of the  
650 *Mycobacterium chelonae-Mycobacterium abscessus* group. *J. Proteome Res.* 8, 2319–  
651 2330. doi:10.1021/pr8009462.
- 652 Gutiérrez, A. V., Viljoen, A., Ghigo, E., Herrmann, J.-L., and Kremer, L. (2018).  
653 Glycopeptidolipids, a Double-Edged Sword of the *Mycobacterium abscessus* Complex.  
654 *Front. Microbiol.* 9, 1145. doi:10.3389/fmicb.2018.01145.
- 655 Howard, S. T., Rhoades, E., Recht, J., Pang, X., Alsup, A., Kolter, R., et al. (2006).  
656 Spontaneous reversion of *Mycobacterium abscessus* from a smooth to a rough  
657 morphotype is associated with reduced expression of glycopeptidolipid and  
658 reacquisition of an invasive phenotype. *Microbiology* 152, 1581–1590.  
659 doi:10.1099/mic.0.28625-0.
- 660 Hunt-Serracin, A. C., Parks, B. J., Boll, J., and Boutte, C. C. (2019). *Mycobacterium*  
661 *abscessus* Cells Have Altered Antibiotic Tolerance and Surface Glycolipids in  
662 Artificial Cystic Fibrosis Sputum Medium. *Antimicrobial Agents and Chemotherapy* 63,  
663 1370. doi:10.1128/AAC.02488-18.
- 664 Jarand, J., Levin, A., Zhang, L., Huitt, G., Mitchell, J. D., and Daley, C. L. (2011). Clinical  
665 and microbiologic outcomes in patients receiving treatment for *Mycobacterium*  
666 *abscessus* pulmonary disease. *Clin. Infect. Dis.* 52, 565–571. doi:10.1093/cid/ciq237.
- 667 Juncker, A. S., Willenbrock, H., Heijne, von, G., Brunak, S., Nielsen, H., and Krogh, A.  
668 (2003). Prediction of lipoprotein signal peptides in Gram-negative bacteria. *Protein Sci.*  
669 12, 1652–1662. doi:10.1110/ps.0303703.
- 670 Käll, L., Krogh, A., and Sonnhammer, E. L. L. (2007). Advantages of combined  
671 transmembrane topology and signal peptide prediction--the Phobius web server.  
672 *Nucleic Acids Research* 35, W429–32. doi:10.1093/nar/gkm256.
- 673 Kulka, K., Hatfull, G., and Ojha, A. K. (2012). Growth of *Mycobacterium tuberculosis*  
674 biofilms. *JoVE*. doi:10.3791/3820.
- 675 Kumar, A., Chandolia, A., Chaudhry, U., Brahmachari, V., and Bose, M. (2005).  
676 Comparison of mammalian cell entry operons of mycobacteria: in silico analysis and  
677 expression profiling. *FEMS Immunol. Med. Microbiol.* 43, 185–195.  
678 doi:10.1016/j.femsim.2004.08.013.
- 679 Laencina, L., Dubois, V., Le Moigne, V., Viljoen, A., Majlessi, L., Pritchard, J., et al.  
680 (2018). Identification of genes required for *Mycobacterium abscessus* growth in vivo  
681 with a prominent role of the ESX-4 locus. *Proc. Natl. Acad. Sci. U.S.A.* 115, E1002–

- 682 E1011. doi:10.1073/pnas.1713195115.
- 683 Lee, M.-R., Sheng, W.-H., Hung, C.-C., Yu, C.-J., Lee, L.-N., and Hsueh, P.-R. (2015).  
684 *Mycobacterium abscessus* Complex Infections in Humans. *Emerg. Infect. Dis.* 21,  
685 1638–1646. doi:10.3201/2109.141634.
- 686 Malhotra, S., Vedithi, S. C., and Blundell, T. L. (2017). Decoding the similarities and  
687 differences among mycobacterial species. *PLoS Negl Trop Dis* 11, e0005883.  
688 doi:10.1371/journal.pntd.0005883.
- 689 Maurer, F. P., Bruderer, V. L., Ritter, C., Castelberg, C., Bloemberg, G. V., and Böttger, E.  
690 C. (2014a). Lack of antimicrobial bactericidal activity in *Mycobacterium abscessus*.  
691 *Antimicrobial Agents and Chemotherapy* 58, 3828–3836. doi:10.1128/AAC.02448-14.
- 692 Maurer, F., Castelberg, C., Braun, von, A., Wolfensberger, A., Bloemberg, G., Böttger, E.,  
693 et al. (2014b). Postsurgical wound infections due to rapidly growing mycobacteria in  
694 Swiss medical tourists following cosmetic surgery in Latin America between 2012 and  
695 2014. *Euro Surveill.* 19, 20905. doi:10.2807/1560-7917.es2014.19.37.20905.
- 696 Moriya, Y., Itoh, M., Okuda, S., Yoshizawa, A. C., and Kanehisa, M. (2007). KAAS: an  
697 automatic genome annotation and pathway reconstruction server. *Nucleic Acids*  
698 *Research* 35, W182–5. doi:10.1093/nar/gkm321.
- 699 Mukherjee, S., and Bassler, B. L. (2019). Bacterial quorum sensing in complex and  
700 dynamically changing environments. *Nature Publishing Group* 17, 371–382.  
701 doi:10.1038/s41579-019-0186-5.
- 702 Nessar, R., Cambau, E., Reytrat, J.-M., Murray, A., and Gicquel, B. (2012). *Mycobacterium*  
703 *abscessus*: a new antibiotic nightmare. *J. Antimicrob. Chemother.* 67, 810–818.  
704 doi:10.1093/jac/dkr578.
- 705 Nurk, S., Bankevich, A., Antipov, D., Gurevich, A. A., Korobeynikov, A., Lapidus, A., et  
706 al. (2013). Assembling single-cell genomes and mini-metagenomes from chimeric  
707 MDA products. *J. Comput. Biol.* 20, 714–737. doi:10.1089/cmb.2013.0084.
- 708 O'Toole, N., Min, X. J., Butler, G., Storms, R., and Tsang, A. (2013). *Sequence-Based*  
709 *Analysis of Fungal Secretomes*. Elsevier B.V doi:10.1016/S1874-5334(06)80015-8.
- 710 Orme, I. M., and Ordway, D. J. (2014). Host response to nontuberculous mycobacterial  
711 infections of current clinical importance. *Infection and Immunity* 82, 3516–3522.  
712 doi:10.1128/IAI.01606-13.
- 713 Petersen, T. N., Brunak, S., Heijne, von, G., and Nielsen, H. (2011). SignalP 4.0:  
714 discriminating signal peptides from transmembrane regions. *Nature Publishing Group*  
715 8, 785–786. doi:10.1038/nmeth.1701.
- 716 Ripoll, F., Deshayes, C., Pasek, S., Laval, F., Beretti, J.-L., Biet, F., et al. (2007). Genomics  
717 of glycopeptidolipid biosynthesis in *Mycobacterium abscessus* and *M. chelonae*. *BMC*

- 718 *Genomics* 8, 114–9. doi:10.1186/1471-2164-8-114.
- 719 Ripoll, F., Pasek, S., Schenowitz, C., Dossat, C., Barbe, V., Rottman, M., et al. (2009). Non  
720 mycobacterial virulence genes in the genome of the emerging pathogen *Mycobacterium*  
721 *abscessus*. *PLoS ONE* 4, e5660. doi:10.1371/journal.pone.0005660.
- 722 Roux, A.-L., Viljoen, A., Bah, A., Simeone, R., Bernut, A., Laencina, L., et al. (2016). The  
723 distinct fate of smooth and rough *Mycobacterium abscessus* variants inside  
724 macrophages. *Open Biol* 6, 160185. doi:10.1098/rsob.160185.
- 725 Ryan, K., and Byrd, T. F. (2018). *Mycobacterium abscessus*: Shapeshifter of the  
726 Mycobacterial World. *Front. Microbiol.* 9, 2642. doi:10.3389/fmicb.2018.02642.
- 727 Sanguinetti, M., Ardito, F., Fiscarelli, E., La Sorda, M., D'Argenio, P., Ricciotti, G., et al.  
728 (2001). Fatal pulmonary infection due to multidrug-resistant *Mycobacterium abscessus*  
729 in a patient with cystic fibrosis. *Journal of Clinical Microbiology* 39, 816–819.  
730 doi:10.1128/JCM.39.2.816-819.2001.
- 731 Shin, A.-R., Sohn, H., Won, C. J., Lee, B., Kim, W. S., Kang, H. B., et al. (2010).  
732 Characterization and identification of distinct *Mycobacterium massiliense* extracellular  
733 proteins from those of *Mycobacterium abscessus*. *J. Microbiol.* 48, 502–511.  
734 doi:10.1007/s12275-010-0038-5.
- 735 Sonnhammer, E. L., Heijne, von, G., and Krogh, A. (1998). A hidden Markov model for  
736 predicting transmembrane helices in protein sequences. *Proc Int Conf Intell Syst Mol*  
737 *Biol* 6, 175–182.
- 738 Tjalsma, H., Antelmann, H., Jongbloed, J. D. H., Braun, P. G., Darmon, E., Dorenbos, R.,  
739 et al. (2004). Proteomics of protein secretion by *Bacillus subtilis*: separating the  
740 “secrets” of the secretome. *Microbiol. Mol. Biol. Rev.* 68, 207–233.  
741 doi:10.1128/MMBR.68.2.207-233.2004.
- 742 Tortoli, E., Fedrizzi, T., Meehan, C. J., Trovato, A., Grottola, A., Giacobazzi, E., et al.  
743 (2017). The new phylogeny of the genus *Mycobacterium*: The old and the news. *Infect.*  
744 *Genet. Evol.* 56, 19–25. doi:10.1016/j.meegid.2017.10.013.
- 745 Tortoli, E., Kohl, T. A., Brown-Elliott, B. A., Trovato, A., Leão, S. C., Garcia, M. J., et al.  
746 (2016). Emended description of *Mycobacterium abscessus*, *Mycobacterium abscessus*  
747 subsp. *abscessus* and *Mycobacterium abscessus* subsp. *bolletii* and designation of  
748 *Mycobacterium abscessus* subsp. *massiliense* comb. nov. *Int. J. Syst. Evol. Microbiol.*  
749 66, 4471–4479. doi:10.1099/ijsem.0.001376.
- 750 Waman, V. P., Vedithi, S. C., Thomas, S. E., Bannerman, B. P., Munir, A., Skwark, M. J.,  
751 et al. (2019). Mycobacterial genomics and structural bioinformatics: opportunities and  
752 challenges in drug discovery. *Emerg Microbes Infect* 8, 109–118.  
753 doi:10.1080/22221751.2018.1561158.
- 754 Wang, S., Wei, W., and Cai, X. (2015). Genome-wide analysis of excretory/secretory

755 proteins in *Echinococcus multilocularis*: insights into functional characteristics of the  
756 tapeworm secretome. *Parasites & Vectors* 8, 666. doi:10.1186/s13071-015-1282-7.

757 Yadav, J. S., and Gupta, M. (2012). Secretome differences between the taxonomically  
758 related but clinically differing mycobacterial species *Mycobacterium abscessus* and *M.*  
759 *chelonae*. *JIOMICS* 2, 1–16. doi:10.5584/jiomics.v2i2.98.

760 Zdobnov, E. M., and Apweiler, R. (2001). InterProScan - an integration platform for the  
761 signature-recognition methods in InterPro. *Bioinformatics* 17, 847–848.  
762 doi:10.1093/bioinformatics/17.9.847.

763 Zheng, J., Ren, X., Wei, C., Yang, J., Hu, Y., Liu, L., et al. (2013). Analysis of the  
764 secretome and identification of novel constituents from culture filtrate of bacillus  
765 Calmette-Guerin using high-resolution mass spectrometry. *Mol. Cell Proteomics* 12,  
766 2081–2095. doi:10.1074/mcp.M113.027318.

767

768

769

770

771

772

773

774

775

776

777

778

779

780

781

782

783

784 **Figure 1.**

### A) Cellular Component

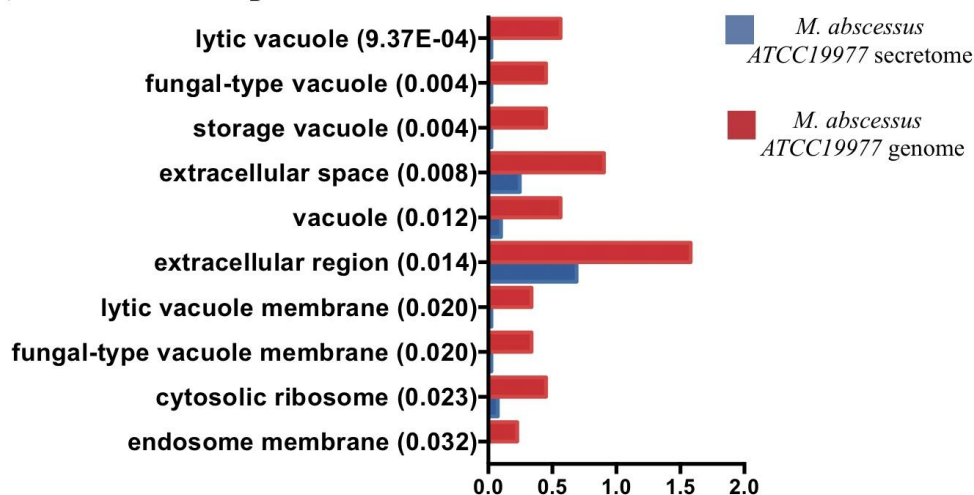

### B) Molecular Function

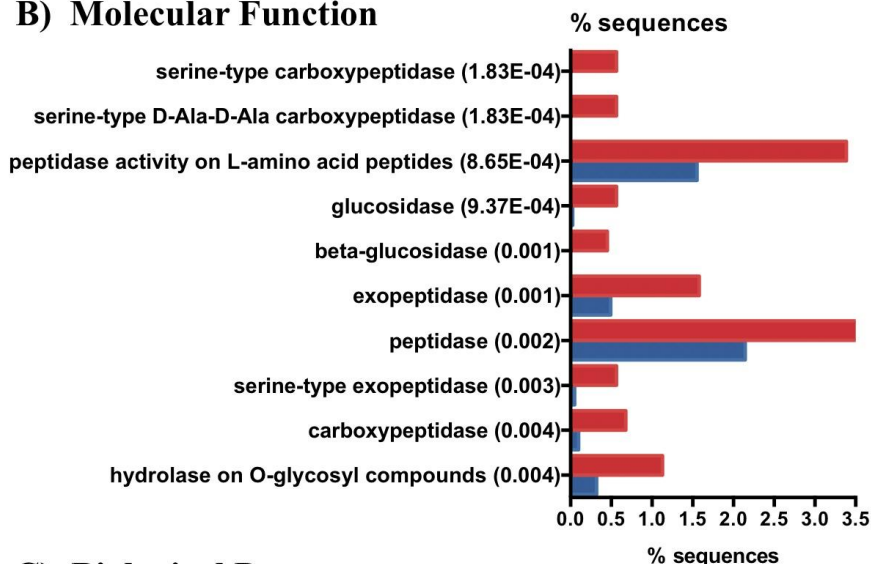

### C) Biological Process

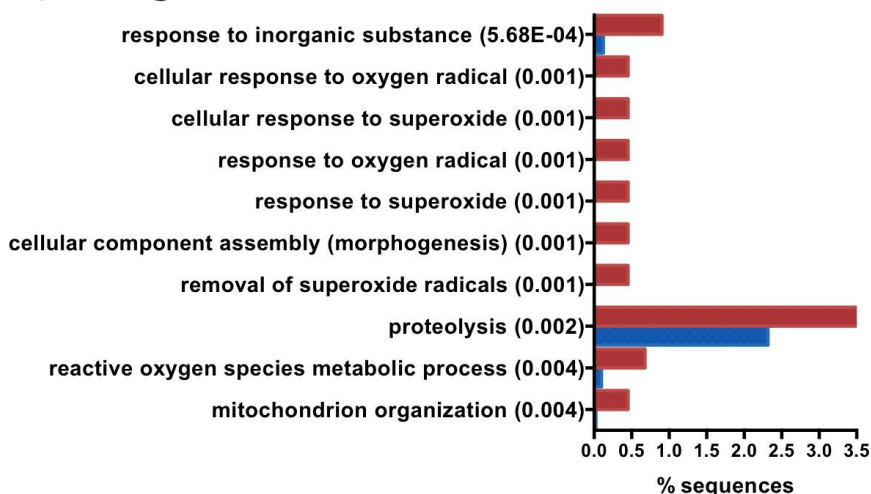

785

786 **Figure 2.**

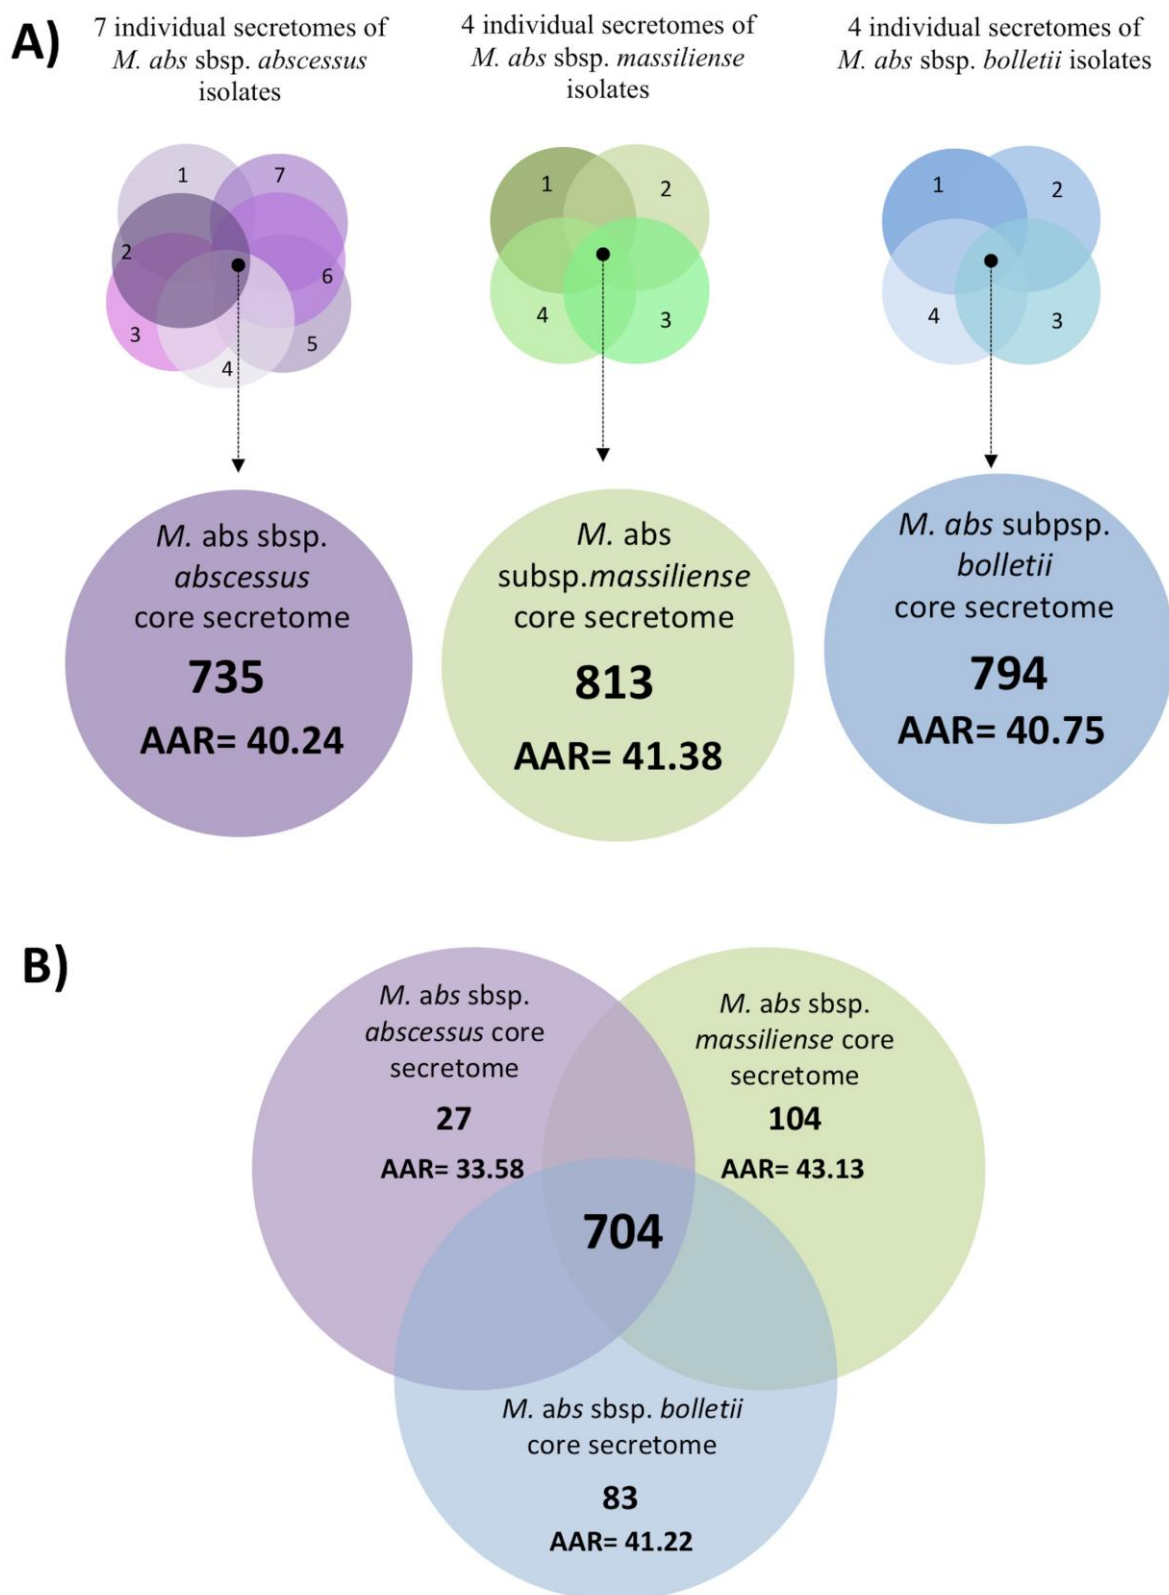

788 **Figure 3.**

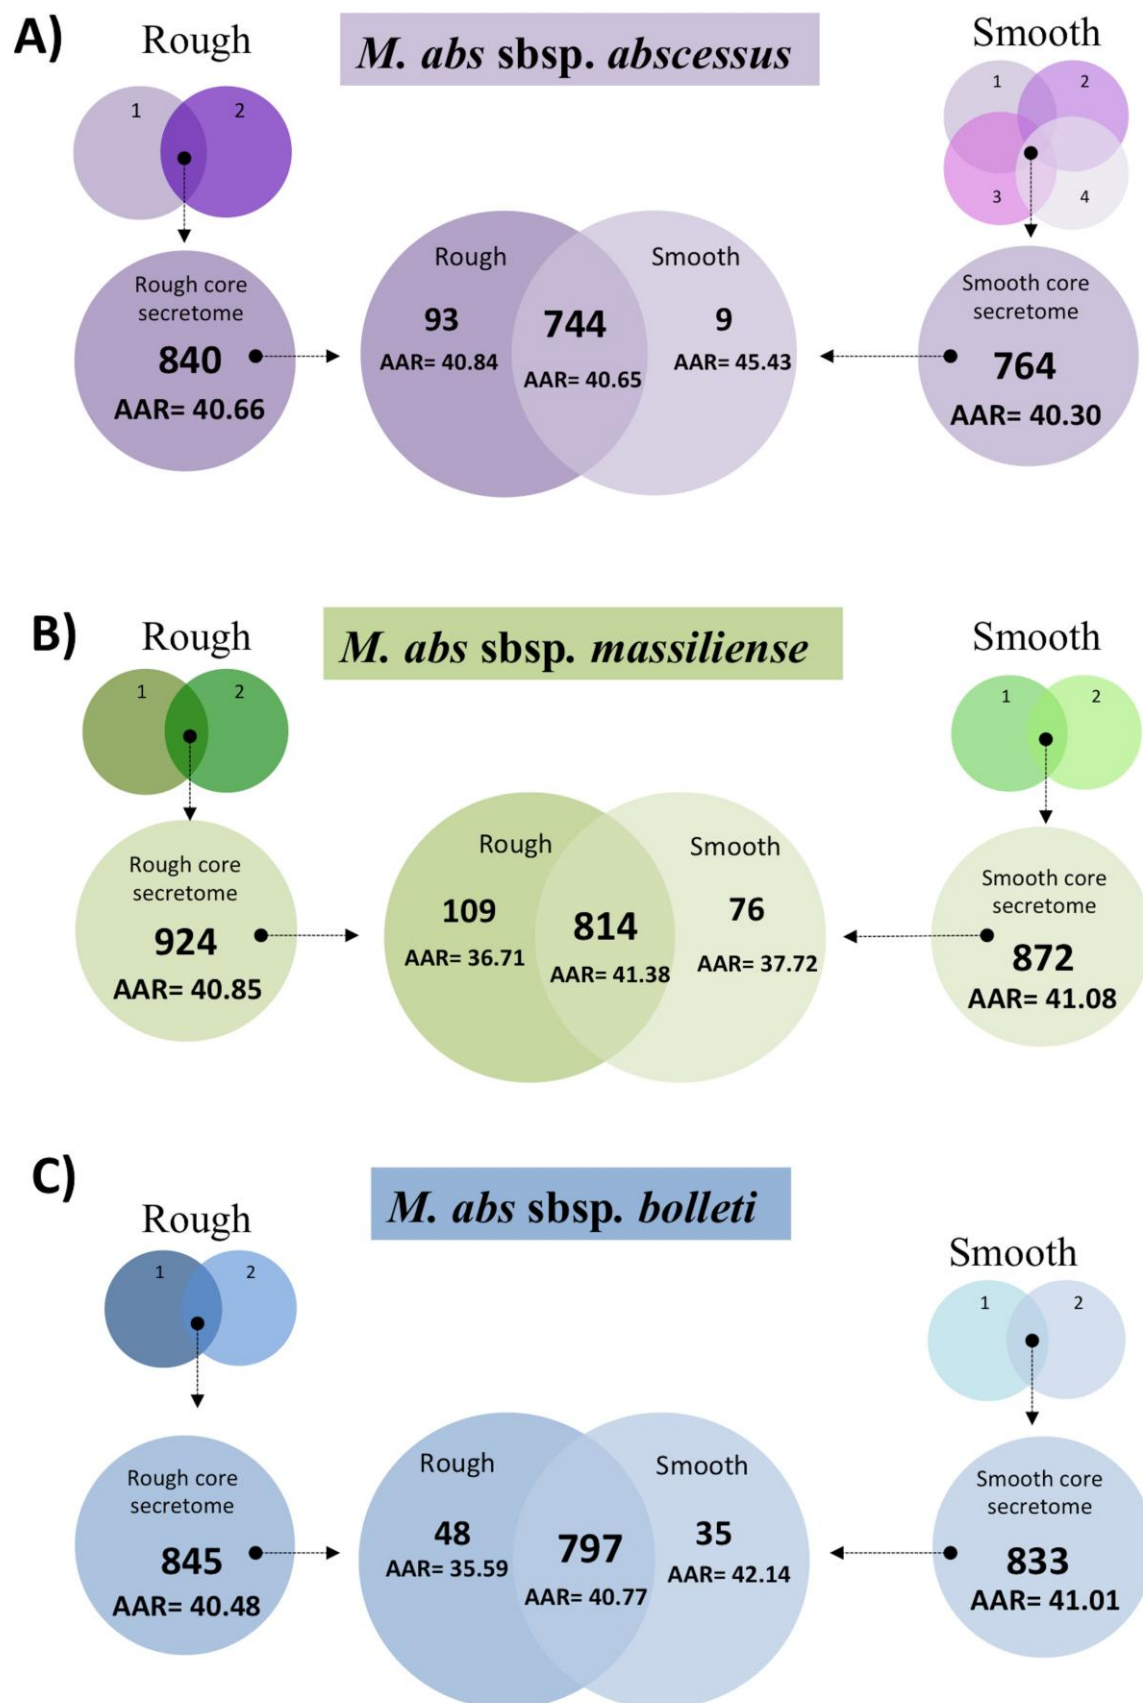



790 **Figure 4.**

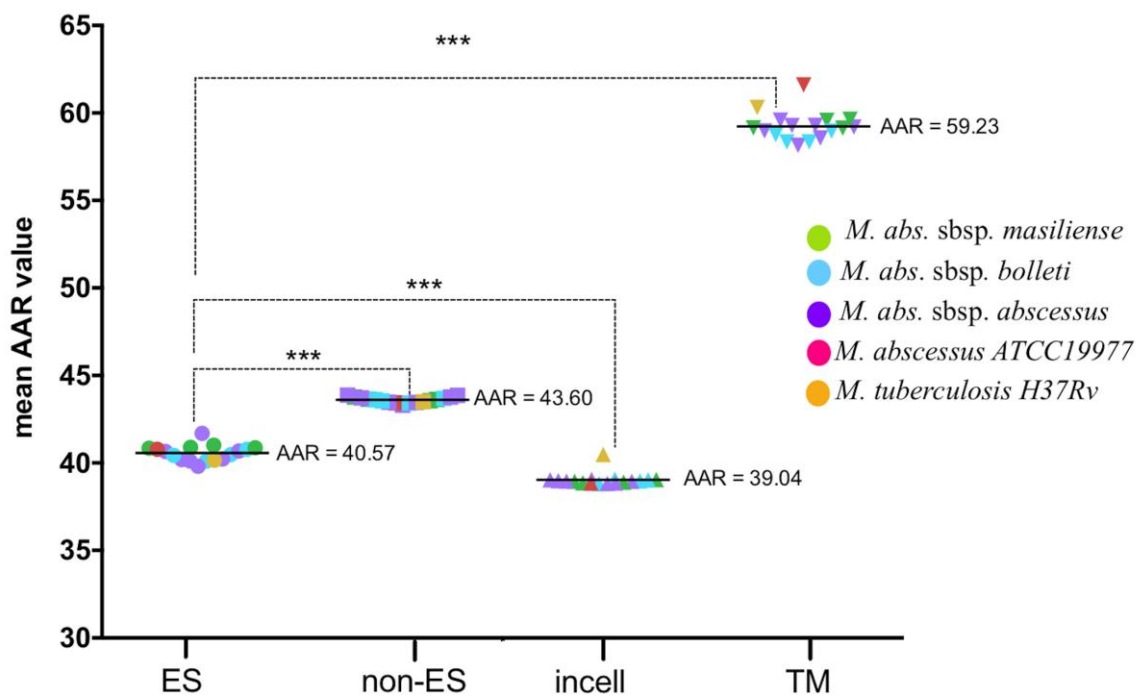

791

792

793

794

795

796

797

798

799

800

801

802

803

804

805 **Figure 5.**

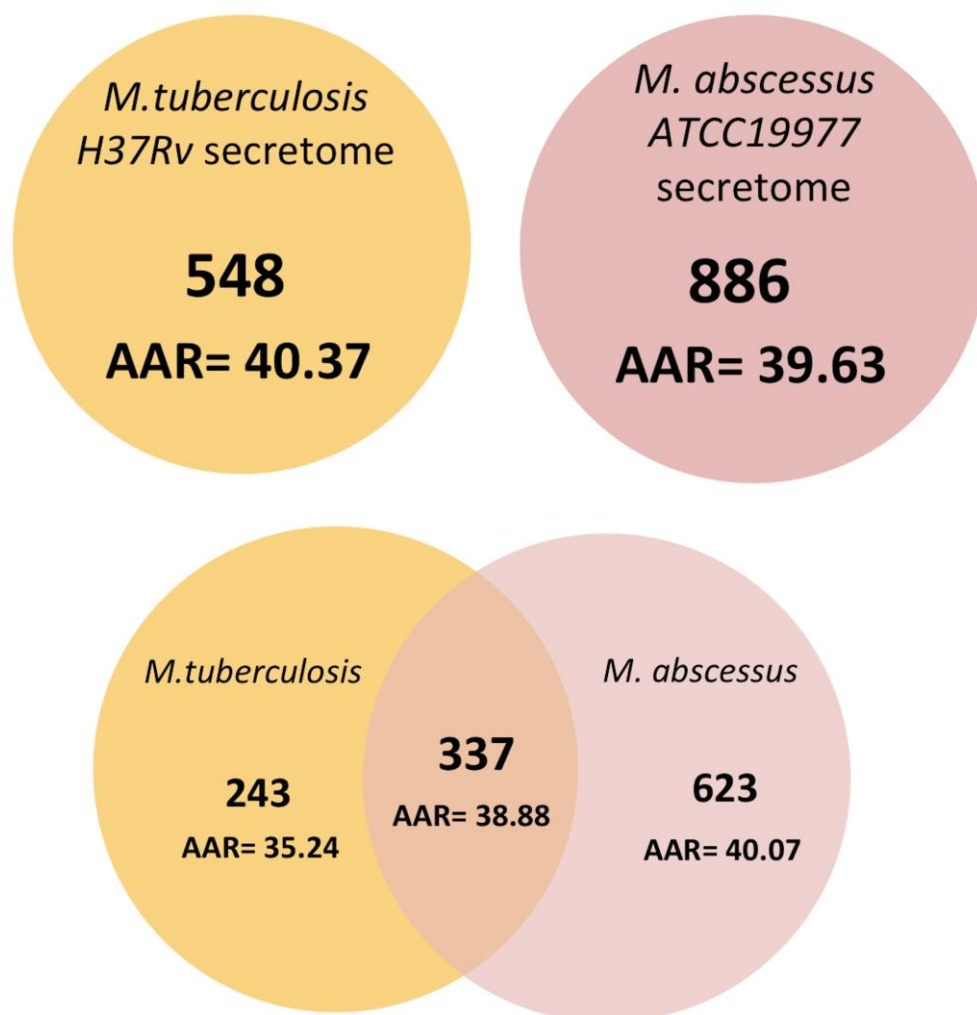

806
